# Supplementary material for: Personalized Nutrition in Patients with Type 2 Diabetes and Chronic Kidney Disease: The Two-Edged Sword of Dietary Protein Intake
Source: MDPI journal article supplement (doi:10.3390/jpm12020300), 2022-02-17
Supplement: s1 [file s1]

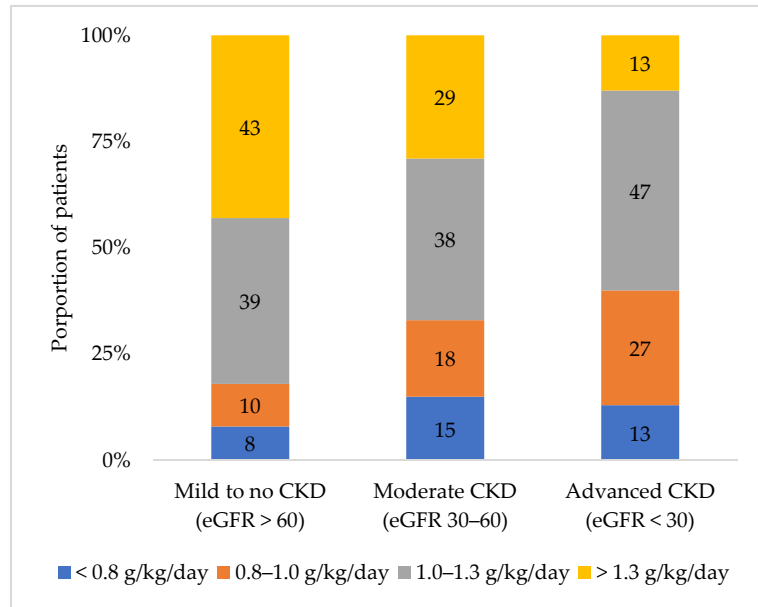

(a)

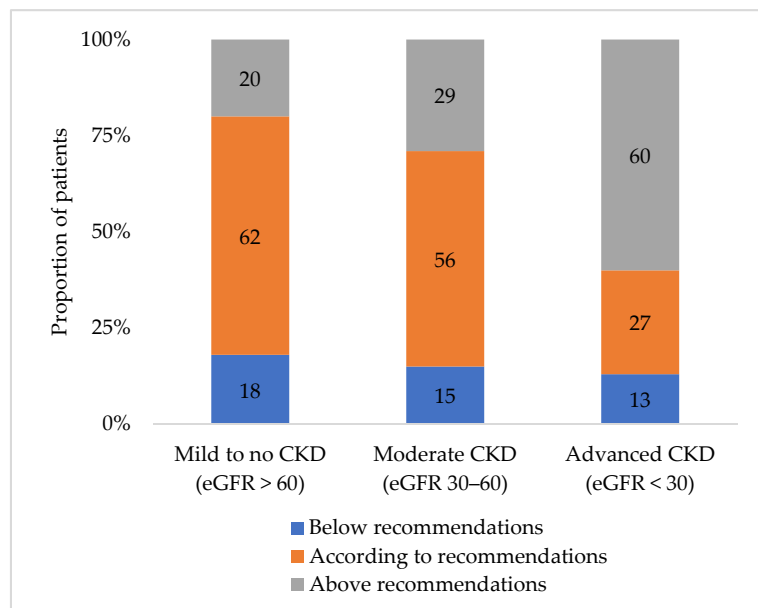

(b)

**Figure S1.** (a) Categories of dietary protein intake (g/kg/day) across stages of chronic kidney disease (CKD) in the Diabetes and Lifestyle Cohort Twente; (b) Adherence to protein recommendations across stages of CKD in the Diabetes and Lifestyle Cohort Twente.

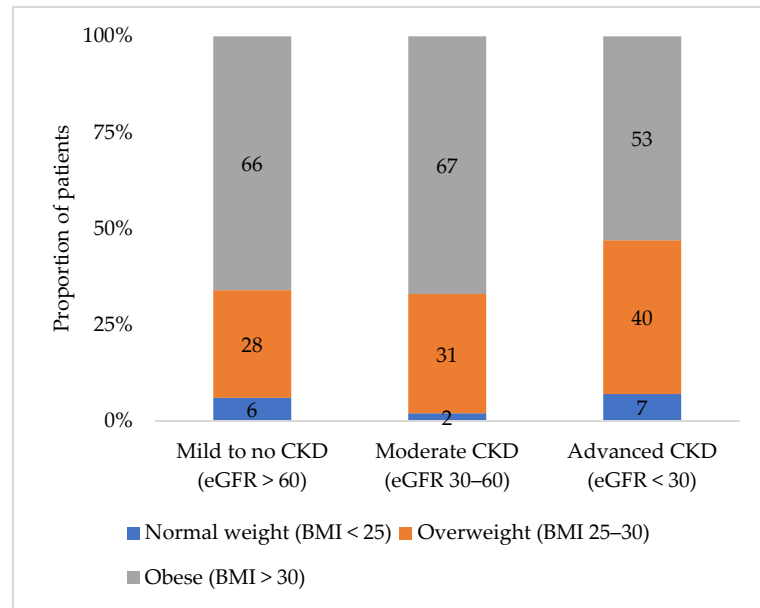

**Figure S2.** Categories of body mass index (BMI, kg/m<sup>2</sup>) across stages of chronic kidney disease (CKD) in the Diabetes and Lifestyle Cohort Twente.

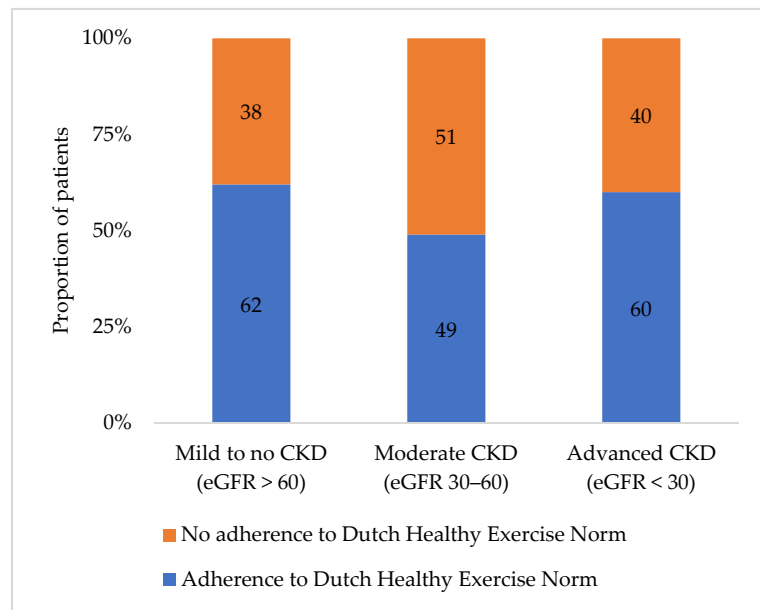

**Figure S3.** Adherence to the Dutch Healthy Exercise Norm across stages of chronic kidney disease (CKD) in the Diabetes and Lifestyle Cohort Twente.
